# Supplementary material
Source: PubMed Central journal article supplement (PMC4860531)
Supplement: PulmCirc-006-S15.s001.pdf [file PulmCirc-006-S15.s001.pdf]

**Appendix from Frey et al., “Assessment of the effects of renal impairment and smoking on the pharmacokinetics of a single oral dose of the soluble guanylate cyclase stimulator riociguat (BAY 63-2521)”  
(Pulm. Circ., vol. 6, no. S1, p. S15)**

**Supplementary table**

Table S1. Pharmacokinetic parameters for riociguat and metabolite M1 in nonsmoking healthy individuals and patients with mild, moderate, or severe renal impairment, following a single oral dose of riociguat 1.0 mg

| Parameter                        | Normal<br>(CL <sub>CR</sub> > 80 mL/min) | Mild<br>(CL <sub>CR</sub> = 50–80 mL/min) | Moderate<br>(CL <sub>CR</sub> = 30–49 mL/min) | Severe<br>(CL <sub>CR</sub> < 30 mL/min) <sup>a</sup> |
|----------------------------------|------------------------------------------|-------------------------------------------|-----------------------------------------------|-------------------------------------------------------|
| Patients, no.                    | 14                                       | 12                                        | 12                                            | 14                                                    |
| <b>Riociguat</b>                 |                                          |                                           |                                               |                                                       |
| AUC, µg·h/L                      | 283 (32.3)                               | 466 (73.2)                                | 691 (80.7)                                    | 523 (70) <sup>b</sup>                                 |
| AUC <sub>norm</sub> , kg·h/L     | 24.0 (34.9)                              | 36.7 (79.8)                               | 57.4 (83.9)                                   | 37.0 (66.6)                                           |
| C <sub>max</sub> , µg/L          | 37.7 (16.3)                              | 46.0 (21.1)                               | 42.9 (37.0)                                   | 40.6 (38) <sup>b</sup>                                |
| C <sub>max, norm</sub> , kg/L    | 3.20 (13.5)                              | 3.62 (24.4)                               | 3.57 (34.3)                                   | 3.13 (29.2)                                           |
| t <sub>max</sub> , hours         | 1.00 (0.500–2.00)                        | 1.00 (0.750–3.00)                         | 1.25 (0.750–3.00)                             | 1.00 (0.500–4.00)                                     |
| t <sub>1/2</sub> , hours         | 7.00 (36.9)                              | 12.2 (72.6)                               | 15.8 (71.8)                                   | 11.1 (60.5)                                           |
| CL/F, L/h                        | 3.54 (32.3)                              | 2.15 (73.2)                               | 1.45 (80.7)                                   | 2.13 (65.0)                                           |
| f <sub>u</sub> , %               | 3.39 (19.4)                              | 3.14 (22.5)                               | 4.00 (22.8)                                   | 4.21 (27.0)                                           |
| AUC <sub>u, norm</sub> , kg·h/L  | 0.813 (32.6)                             | 1.15 (80.6)                               | 2.30 (80.4)                                   | 1.56 (63.7)                                           |
| C <sub>max, u, norm</sub> , kg/L | 0.108 (24.5)                             | 0.114 (36.4)                              | 0.143 (35.5)                                  | 0.132 (22.6)                                          |
| A <sub>E, ur</sub> , %           | 9.63 ± 4.19                              | 11.4 ± 7.28                               | 7.65 ± 3.55                                   | 4.04 ± 2.93 <sup>c</sup>                              |
| CL <sub>R</sub> , L/h            | 0.312 (42.6)                             | 0.208 (37.8)                              | 0.105 (55.2)                                  | 0.0564 (92.1) <sup>c</sup>                            |
| <b>Metabolite M1</b>             |                                          |                                           |                                               |                                                       |
| AUC, µg·h/L                      | 256 (23.7)                               | 285 (43.8)                                | 407 (50.2)                                    | 547 (62) <sup>b</sup>                                 |
| AUC <sub>norm</sub> , kg·h/L     | 22.5 (21.5)                              | 23.2 (44.0)                               | 35.0 (44.8)                                   | 40.9 (48.9)                                           |
| C <sub>max</sub> , µg/L          | 8.92 (40.8)                              | 7.09 (74.4)                               | 6.85 (55.0)                                   | 8.73 (52) <sup>b</sup>                                |
| C <sub>max, norm</sub> , kg/L    | 0.783 (37.8)                             | 0.577 (69.7)                              | 0.589 (46.0)                                  | 0.679 (45.5)                                          |
| t <sub>max</sub> , hours         | 8.00 (4.00–24.0)                         | 11.0 (3.00–24.1)                          | 24.0 (4.00–48.0)                              | 24.0 (2.00–24.1)                                      |
| t <sub>1/2</sub> , hours         | 14.7 (24.3)                              | 25.04 (44.3)                              | 31.4 (60.0)                                   | 34.0 (74.7)                                           |
| CL/F, L/h                        | 3.77 (23.7)                              | 3.39 (43.8)                               | 2.38 (50.2)                                   | 1.93 (55.7)                                           |
| f <sub>u</sub> , %               | 2.86 (15.1)                              | 2.65 (18.9)                               | 3.47 (19.9)                                   | 3.96 (30.6)                                           |
| AUC <sub>u, norm</sub> , kg·h/L  | 0.643 (24.4)                             | 0.619 (43.5)                              | 1.21 (44.8)                                   | 1.62 (50.1)                                           |
| C <sub>max, u, norm</sub> , kg/L | 0.0224 (40.9)                            | 0.0153 (70.5)                             | 0.0204 (47.4)                                 | 0.0269 (51.5)                                         |
| A <sub>E, ur</sub> , %           | 18.7 ± 7.29                              | 11.0 ± 6.24                               | 8.87 ± 2.98 <sup>d</sup>                      | 4.16 ± 3.64 <sup>e</sup>                              |
| CL <sub>R</sub> , L/h            | 0.688 (56.9)                             | 0.367 (67.3)                              | 0.256 (39.9) <sup>d</sup>                     | 0.0670 (75.0) <sup>e</sup>                            |

Note: Values are geometric means (percentage coefficient of variation), except for the number of patients; t<sub>max</sub>, which is expressed as median (range); and A<sub>E, ur</sub>, which is expressed as arithmetic mean ± standard deviation. A<sub>E, ur</sub>: amount excreted into urine from time 0 to infinity; AUC: area under the plasma concentration–time curve from time 0 to infinity; AUC<sub>norm</sub>: AUC divided by dose of riociguat per kilogram body weight for total riociguat/M1; AUC<sub>u, norm</sub>: AUC divided by dose of riociguat per kilogram body weight for unbound riociguat/M1; CL<sub>CR</sub>: creatinine clearance; CL/F: apparent oral clearance for total riociguat/M1; CL<sub>R</sub>: renal clearance of riociguat/M1; C<sub>max</sub>: maximum concentration in plasma; C<sub>max, norm</sub>: C<sub>max</sub> divided by dose of riociguat per kilogram body weight for total riociguat/M1; C<sub>max, u, norm</sub>: C<sub>max</sub> divided by dose of riociguat per kilogram body weight for unbound riociguat/M1; f<sub>u</sub>: fraction unbound; t<sub>max</sub>: time to C<sub>max</sub> of total riociguat/M1; t<sub>1/2</sub>: terminal elimination half-life for total riociguat/M1.

<sup>a</sup> In study I, individuals with severe renal impairment received riociguat 0.5 mg, and therefore pharmacokinetic concentrations recorded for these individuals were normalized to a 1.0-mg dose before analysis; all other participants in both studies received riociguat 1.0 mg.

<sup>b</sup> AUC and C<sub>max</sub> values shown for individuals with severe renal impairment are taken from study II (n = 8), in which individuals with severe renal impairment received riociguat 1.0 mg.

<sup>c</sup> Data available from 11 patients.

<sup>d</sup> Data available from 8 patients.

<sup>e</sup> Data available from 7 patients.
